# Supplementary material for: SDF-1/CXCR4 Signaling Maintains Stemness Signature in Mouse Neural Stem/Progenitor Cells
Source: Hindawi journal article supplement (doi:10.1155/2017/2493752), 2017-01-01
Supplement: f1 [file 2493752.f1.pdf]

**A**

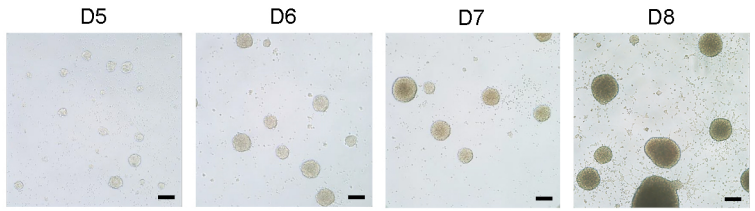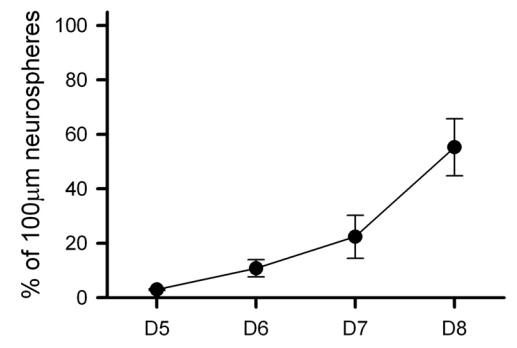

**B**

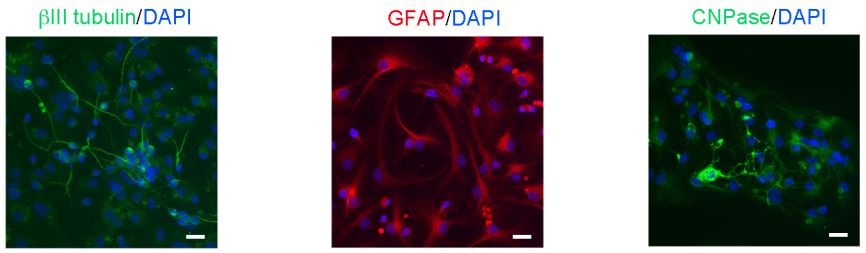

**A**

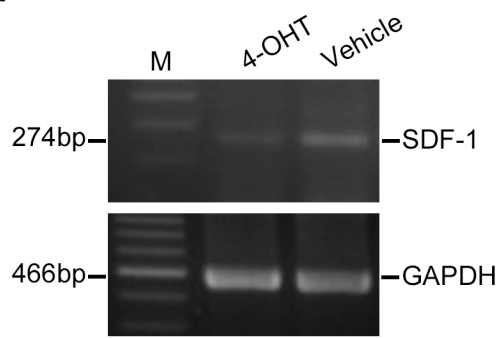

**B**

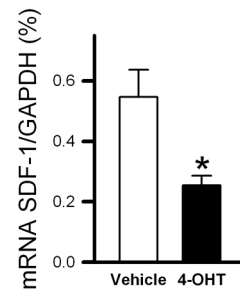

**A**SDF-1<sup>F/+</sup>;TgSDF-1<sup>F/-</sup>;Tg

Ki-67

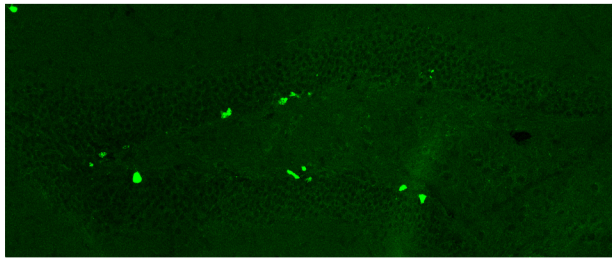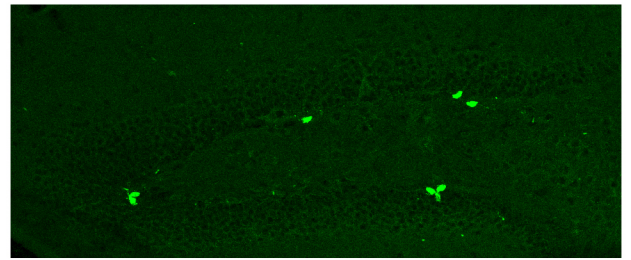

SOX2

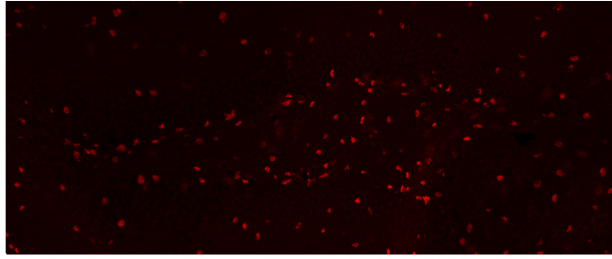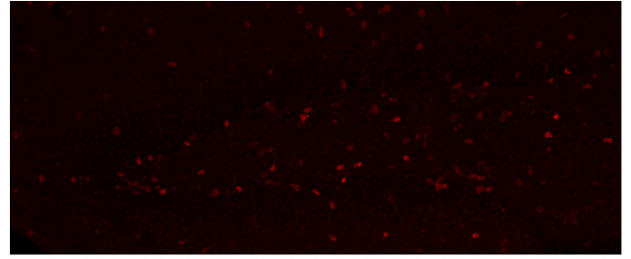

Hoechst

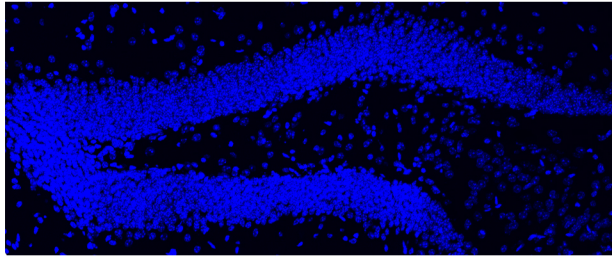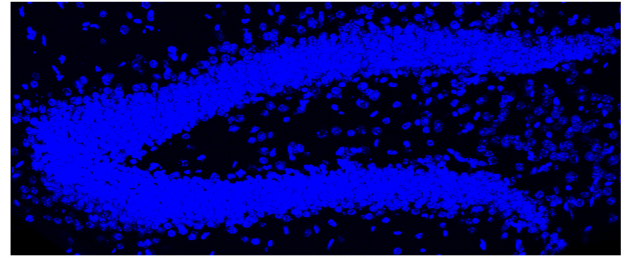

Merge

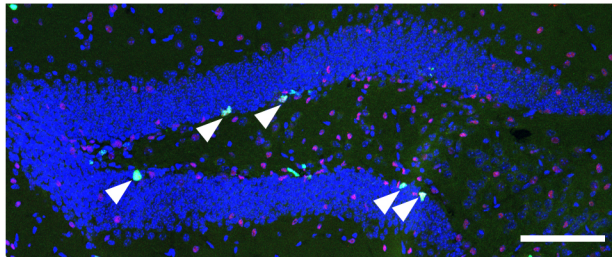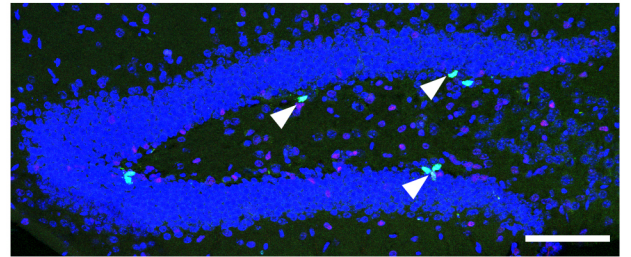**B**Ki-67<sup>+</sup>SOX2<sup>+</sup>Ki-67<sup>+</sup>/SOX2<sup>+</sup>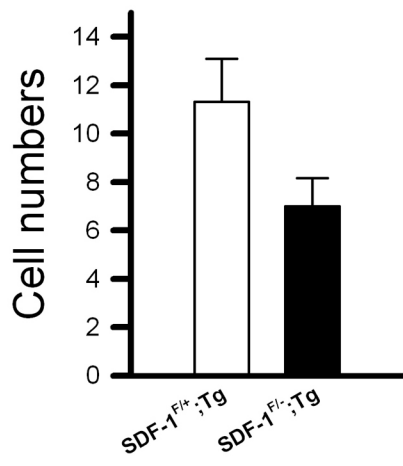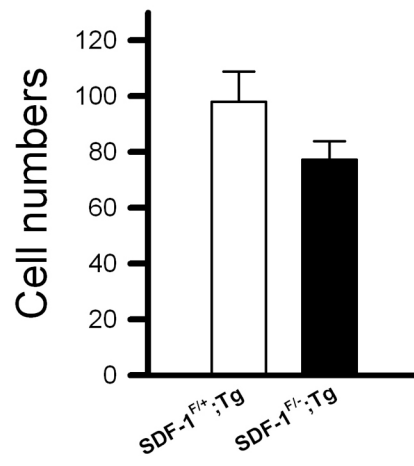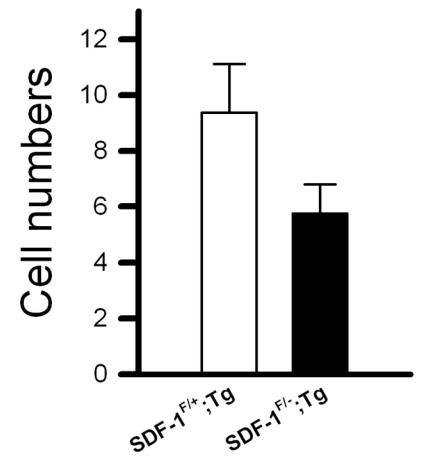

SDF-1<sup>F/+</sup>;Tg

SDF-1<sup>F/-</sup>;Tg

DCX

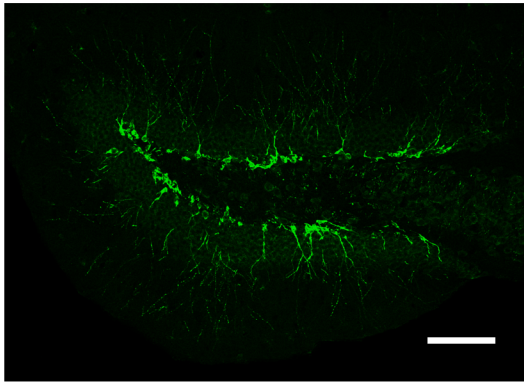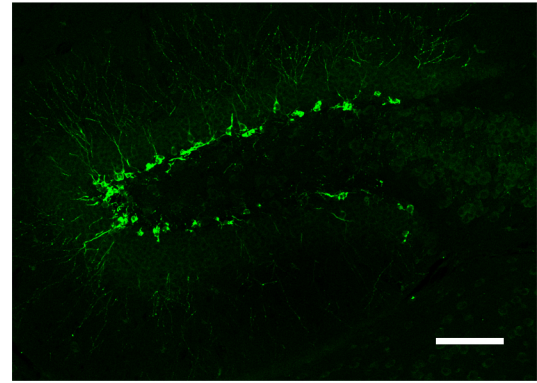

Prox1

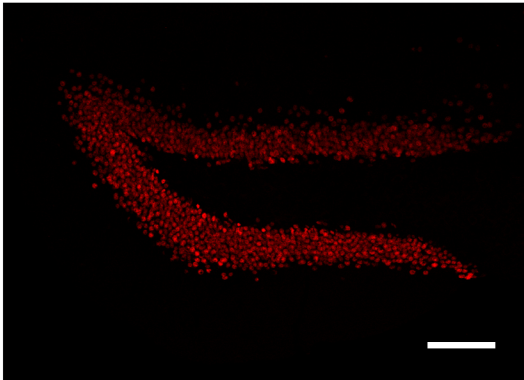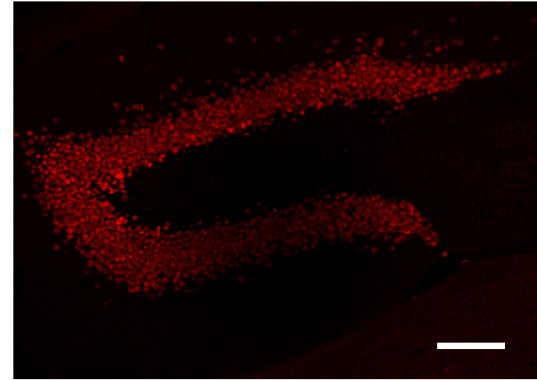

Merge

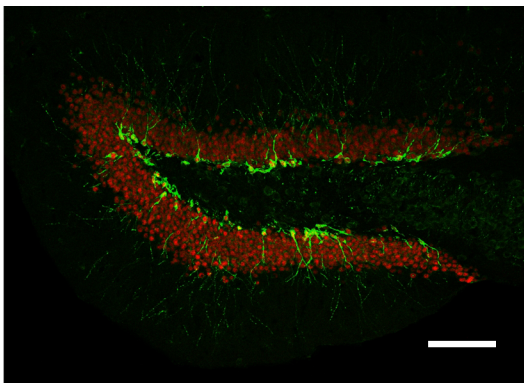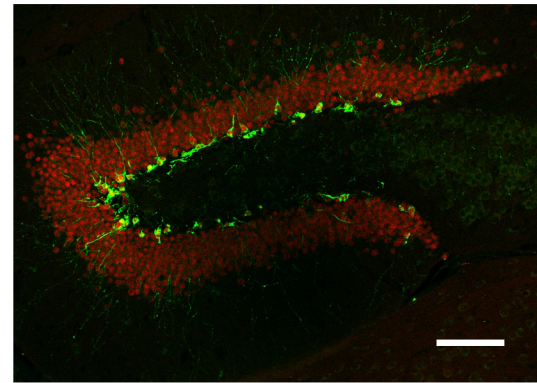



## Supplemental Figure Legends

### **S1. Primary neurospheres culture derived from postnatal mouse brains expressed**

#### **NSCs/NPCs characteristics.**

Primary NSCs/NPCs obtained from postnatal day 1 mice were cultured in a density of  $2 \times 10^5$  cells/ml. (A) Representative images of neurospheres from 5DIV to 8DIV. The neurospheres showed a significant increase in size during the cultured period (left panel). Scale bar, 100  $\mu$ m. Percentage of neurospheres with large size ( $>100\mu\text{m}$ ) among the total number of neurospheres. Error bars represent S.E.M. of the mean. (right panel) (B) Cells dissociated from neurospheres were multipotent and able to differentiate to neurons ( $\beta$ III tubulin), astrocytes (GFAP) and oligodendrocytes (CNPase). Scale bar, 20  $\mu$ m.

### **S2. Loss of SDF-1 transcripts in neurosphere cultures after 4-OHT-treatment.**

Neurospheres obtained from SDF-1<sup>F/-</sup>;Tg mice were treated with vehicle or with 4-OHT and then harvested on 6DIV. (A) RT-PCR assays performed on total cellular RNA demonstrated significantly decreased levels of SDF-1 transcripts after 4-OHT treatment. (B) Comparison of the relative SDF-1 mRNA levels between two groups of samples after 4-OHT treatment. Data represent the mean  $\pm$  S.E.M., \*  $p < 0.05$ ,  $n=2$  each, Student's *t*-test.

**S3. Deletion of SDF-1 gene showed a decreasing trend in proliferation of NSCs/NPCs in hippocampal DG.**

(A) Four weeks SDF-1<sup>F/+</sup>;Tg or SDF-1<sup>F/-</sup>;Tg mice were received 5 doses of tamoxifen (TAM) in 1-days intervals. Brain samples were collected 1 month after the last TAM injection. Ki-67 (green) or SOX2 (red) were used to label proliferative cells and NSCs/NPCs, respectively, after TAM-induced gene deletion. SDF-1<sup>F/-</sup>;Tg mice exhibited a downward trend in proliferation of NSCs/NPCs in the DG as compared to SDF-1<sup>F/+</sup>;Tg littermates. Arrows head indicate the Ki-67<sup>+</sup>/SOX2<sup>+</sup> cells in or adjacent to the subgranular zone in dentate area. Scale bar, 100  $\mu$ m. (B) Quantification of Ki-67<sup>+</sup>, SOX2<sup>+</sup>, and Ki-67<sup>+</sup>/SOX2<sup>+</sup> cells in DG. Data represent the mean  $\pm$  S.E.M., n=2 different mice and 16 total sections per group (Ki-67<sup>+</sup>,  $p=0.053$ , SOX2<sup>+</sup>,  $p=0.114$ , Ki-67<sup>+</sup>/SOX2<sup>+</sup>,  $p=0.084$ , Student's *t*-test).

**S4. Conditional deletion of SDF-1 gene in adolescent mice did not alter the DCX expression in hippocampus.**

Representative images of DCX (green) and a dentate granule cell specific marker, Prox1 (red), expression in SDF-1<sup>F/-</sup>;Tg and SDF-1<sup>F/+</sup>;Tg mice after 1 month of TAM injection. There were

no significant differences in DCX level between two groups in DG. Scale bar, 100  $\mu\text{m}$ .
